# Supplementary material for: The relevance of the analytical methodology in the geochemical study of beachrock outcrops: Arrigunaga Beach inside the Nerbioi-Ibaizabal estuary (Getxo, Basque Country)
Source: Royal Society of Chemistry journal article supplement (doi:10.1039/c4ay00913d), 2014-01-01
Supplement: c4ay00913d1.pdf [file c4ay00913d1.pdf]

**Table SI 1** Mean concentration and RSD values of the elements measured in the < 75 µm particle size. The major elements (Ca, Fe, Mg, Al, Mn, Na and K) are showed in g/kg, while the rest of them are presented in mg/kg.

|           | S1      |     | S2     |     | S3    |     | S4     |     | S5     |     | S6     |     | S7     |     | S8     |     | S9     |     | S10    |     |
|-----------|---------|-----|--------|-----|-------|-----|--------|-----|--------|-----|--------|-----|--------|-----|--------|-----|--------|-----|--------|-----|
|           | Mean    | RSD | Mean   | RSD | Mean  | RSD | Mean   | RSD | Mean   | RSD | Mean   | RSD | Mean   | RSD | Mean   | RSD | Mean   | RSD | Mean   | RSD |
| <b>Ca</b> | 185.52  | 1.5 | 182.6  | 1.7 | 129   | 15  | 165.9  | 2.2 | 144    | 9.6 | 139.6  | 4.2 | 123.0  | 1.7 | 100.4  | 4.0 | 196.9  | 3.0 | 173.6  | 1.8 |
| <b>Fe</b> | 40.5    | 3.5 | 36.74  | 2.0 | 74.1  | 5.1 | 68.8   | 5.0 | 55.1   | 2.6 | 55.09  | 1.9 | 59.9   | 6.5 | 17.54  | 4.7 | 17.65  | 2.8 | 21.25  | 1.4 |
| <b>Mg</b> | 146.40  | 1.7 | 16.62  | 1.7 | 15.41 | 3.2 | 16.29  | 3.7 | 17.72  | 1.4 | 16.87  | 5.5 | 17.40  | 3.1 | 38.95  | 2.4 | 23.4   | 8.3 | 17.23  | 1.8 |
| <b>Al</b> | 123.964 | 1.2 | 12.66  | 2.8 | 12.14 | 3.8 | 12.45  | 7.0 | 15.61  | 3.5 | 13.51  | 5.3 | 17.13  | 4.2 | 17.30  | 2.4 | 10.7   | 11  | 8.58   | 3.4 |
| <b>Mn</b> | 3.771   | 1.9 | 3.700  | 2.6 | 4.46  | 3.1 | 4.10   | 4.0 | 4.57   | 2.9 | 4.45   | 5.5 | 5.119  | 1.7 | 3.53   | 2.3 | 2.41   | 4.8 | 1.92   | 1.2 |
| <b>Na</b> | 2.313   | 3.0 | 2.562  | 2.8 | 2.305 | 3.4 | 2.212  | 2.7 | 2.734  | 2.6 | 2.462  | 3.5 | 3.15   | 3.8 | 4.31   | 2.9 | 2.00   | 11  | 1.95   | 4.0 |
| <b>K</b>  | 2.072   | 3.6 | 2.027  | 3.4 | 1.70  | 6.6 | 1.86   | 16  | 2.29   | 5.1 | 1.719  | 5.4 | 2.094  | 1.5 | 1.2984 | 6.8 | 1.48   | 12  | 1.13   | 2.4 |
| <b>Sr</b> | 810     | 2.1 | 895    | 3.0 | 770   | 8.3 | 873    | 1.8 | 892    | 2.8 | 829    | 4.4 | 781    | 2.3 | 1132   | 4.1 | 1547   | 2.3 | 1072.6 | 2.4 |
| <b>Ba</b> | 469     | 2.2 | 397.3  | 1.5 | 800   | 2.3 | 858    | 1.2 | 803    | 2.6 | 932    | 14  | 941    | 4.1 | 891    | 6.9 | 292    | 1.4 | 430    | 3.9 |
| <b>Zn</b> | 548     | 3.7 | 356.5  | 1.4 | 461.3 | 1.8 | 479    | 6.3 | 406    | 2.9 | 423    | 6.5 | 522    | 5.9 | 261    | 3.8 | 311.6  | 1.3 | 285.2  | 1.9 |
| <b>Ti</b> | 160     | 8.6 | 179.9  | 3.6 | 185.3 | 4.9 | 193    | 16  | 288.5  | 1.8 | 261    | 5.4 | 358.2  | 1.8 | 356    | 3.7 | 197    | 16  | 136.4  | 2.3 |
| <b>Pb</b> | 129.4   | 2.1 | 113.2  | 1.9 | 224   | 6.8 | 234    | 3.4 | 200.0  | 1.7 | 225    | 5.4 | 214.2  | 15  | 108.2  | 4.4 | 91.4   | 3.2 | 67.30  | 1.5 |
| <b>Cu</b> | 79.9    | 5.7 | 64.0   | 2.8 | 170.6 | 1.5 | 175.2  | 4.8 | 119.6  | 4.0 | 131.2  | 6.3 | 110.3  | 5.7 | 29.13  | 2.5 | 38.9   | 3.2 | 35.9   | 6.4 |
| <b>Cr</b> | 39.0    | 11  | 39.9   | 3.1 | 47.2  | 11  | 42.7   | 3.7 | 81.2   | 4.8 | 49.3   | 7.3 | 76.2   | 1.7 | 17.7   | 12  | 24.7   | 6.9 | 20.5   | 7.4 |
| <b>Ni</b> | 41.3    | 9.9 | 33.0   | 3.9 | 55.6  | 7.6 | 51.5   | 6.4 | 64.5   | 6.7 | 44.2   | 9.4 | 60.0   | 3.4 | 11.5   | 16  | 21.69  | 3.8 | 21.1   | 11  |
| <b>As</b> | 26.8    | 5.7 | 18.28  | 1.3 | 63.8  | 2.1 | 59.2   | 6.4 | 34.0   | 5.3 | 30.3   | 5.8 | 26.4   | 4.1 | 10.31  | 3.9 | 15.6   | 8.1 | 18.78  | 2.4 |
| <b>V</b>  | 14.84   | 5.3 | 14.76  | 3.1 | 22.0  | 5.8 | 22.3   | 6.2 | 20.32  | 2.4 | 23.37  | 4.1 | 19.46  | 3.6 | 13.38  | 4.3 | 14.22  | 3.0 | 14.70  | 6.1 |
| <b>Sn</b> | 14.20   | 6.3 | 12.9   | 8.7 | 18.13 | 2.8 | 18.7   | 17  | 18.71  | 5.1 | 19.7   | 13  | 21.6   | 14  | 9.35   | 9.3 | 7.30   | 10  | 5.385  | 9.2 |
| <b>Co</b> | 10.15   | 2.3 | 7.92   | 2.4 | 20.88 | 1.8 | 18.82  | 4.6 | 12.84  | 5.5 | 11.44  | 6.6 | 9.99   | 2.3 | 2.73   | 3.7 | 6.95   | 5.3 | 5.88   | 1.8 |
| <b>Mo</b> | 3.00    | 18  | 4.08   | 4.1 | 4.20  | 7.8 | 4.62   | 6.8 | 9.00   | 5.2 | 4.99   | 10  | 9.48   | 3.5 | 1.16   | 17  | 2.88   | 16  | 1.82   | 13  |
| <b>Cd</b> | 0.769   | 10  | 0.449  | 4.7 | 0.476 | 9.4 | 0.5636 | 3.2 | 0.499  | 8.1 | 0.430  | 7.0 | 0.4972 | 5.9 | 0.3081 | 5.6 | 0.6337 | 5.1 | 0.4849 | 5.3 |
| <b>Tl</b> | 0.5483  | 2.9 | 0.403  | 4.7 | 0.371 | 6.1 | 0.3787 | 2.0 | 0.3626 | 2.3 | 0.318  | 4.0 | 0.3572 | 2.1 | 0.1744 | 3.4 | 0.2680 | 6.2 | 0.2207 | 3.8 |
| <b>Ag</b> | 0.249   | 6.3 | 0.1952 | 7.6 | 0.337 | 11  | 0.3419 | 3.3 | 0.2968 | 4.2 | 0.2648 | 3.1 | 0.2712 | 3.1 | 0.2141 | 7.0 | 0.1561 | 6.8 | 0.1855 | 2.9 |

**Table SI 2** Mean concentration and RSD values of the elements measured in the 75-250  $\mu\text{m}$  particle size. The major elements ( Fe, Ca, Mg, Al, Mn, Na and K) are showed in g/kg, while the rest of them are presented in mg/kg.

|           | <b>S1</b> |     | <b>S2</b> |      | <b>S3</b> |     | <b>S4</b> |     | <b>S5</b> |     | <b>S6</b> |      | <b>S7</b> |     | <b>S8</b> |     | <b>S9</b> |     | <b>S10</b> |       |
|-----------|-----------|-----|-----------|------|-----------|-----|-----------|-----|-----------|-----|-----------|------|-----------|-----|-----------|-----|-----------|-----|------------|-------|
|           | Mean      | RSD | Mean      | RSD  | Mean      | RSD | Mean      | RSD | Mean      | RSD | Mean      | RSD  | Mean      | RSD | Mean      | RSD | Mean      | RSD | Mean       | RSD   |
| <b>Fe</b> | 210       | 5.1 | 117.36    | 2.3  | 402       | 6.3 | 222       | 6.8 | 213       | 7.9 | 288       | 17   | 169.1     | 5.0 | 95        | 11  | 53.8      | 10  | 122        | 9.0   |
| <b>Ca</b> | 83.2      | 1.5 | 92.53     | 2.9  | 55.7      | 2.7 | 57.6      | 1.9 | 79.2      | 2.7 | 59.0      | 5.5  | 80.0      | 3.2 | 55.1      | 12  | 116.6     | 5.0 | 59.96      | 1.9   |
| <b>Al</b> | 20.69     | 3.3 | 23.34     | 3.5  | 17.56     | 5.8 | 16.3      | 18  | 23.63     | 4.7 | 16.7      | 13   | 23.2      | 7.1 | 18.5      | 9.3 | 17.4      | 10  | 10.03      | 7.0   |
| <b>Mg</b> | 19.74     | 5.2 | 21.79     | 1.3  | 20.28     | 7.0 | 18.7      | 13  | 22.17     | 3.2 | 19.1      | 12   | 19.8      | 6.2 | 31.3      | 8.3 | 27.3      | 8.4 | 14.68      | 5.8   |
| <b>Mn</b> | 7.54      | 3.0 | 6.11      | 3.2  | 9.28      | 5.5 | 7.6       | 15  | 8.232     | 3.3 | 7.9       | 13   | 6.87      | 3.1 | 4.89      | 13  | 4.352     | 1.5 | 2.90       | 5.1   |
| <b>Na</b> | 2.49      | 3.3 | 3.279     | 1.4  | 2.08      | 7.0 | 1.78      | 12  | 2.720     | 2.4 | 1.91      | 15   | 2.56      | 8.5 | 3.88      | 9.6 | 2.435     | 12  | 1.80       | 7.8   |
| <b>K</b>  | 2.33      | 5.1 | 2.90      | 4.3  | 1.55      | 2.6 | 1.458     | 4.2 | 2.38      | 5.1 | 1.55      | 8.7  | 2.34      | 4.9 | 1.48      | 15  | 1.847     | 11  | 1.063      | 2.0   |
| <b>Zn</b> | 984       | 9.4 | 603       | 9.6  | 2550      | 12  | 1612      | 11  | 1146.3    | 3.8 | 2137      | 15   | 1446.8    | 2.8 | 553       | 3.8 | 483       | 14  | 344        | 15    |
| <b>Ba</b> | 693       | 15  | 645       | 19   | 801       | 2.3 | 1003      | 8   | 741       | 14  | 486       | 5    | 632.8     | 6.0 | 595       | 6.8 | 595       | 16  | 647        | 8.9   |
| <b>Sr</b> | 624       | 2.3 | 770       | 4.4  | 353       | 7.5 | 433       | 8.8 | 632       | 2.9 | 414       | 12   | 586       | 4.1 | 656       | 19  | 1001      | 1.6 | 508        | 3.8   |
| <b>Ti</b> | 267       | 4.5 | 317       | 5.5  | 254       | 3.3 | 217       | 14  | 339.37    | 1.2 | 243       | 11   | 326       | 3.5 | 372       | 12  | 340       | 9.4 | 241.5      | 1.8   |
| <b>Cu</b> | 212       | 18  | 100       | 14   | 369       | 24  | 244       | 9.9 | 143       | 24  | 240       | 15   | 147       | 16  | 69        | 18  | 51.8      | 12  | 54.0       | 16    |
| <b>Pb</b> | 146       | 17  | 164       | 10   | 606       | 11  | 404       | 10  | 254       | 23  | 368       | 21   | 240       | 3.5 | 110       | 24  | 99.0      | 8.8 | 60.0       | 7.0   |
| <b>Cr</b> | 46.63     | 1.3 | 29.44     | 2.1  | 79.49     | 6.3 | 48        | 2.9 | 48.1      | 5.6 | 55.5      | 12   | 37.9      | 6.2 | 23.6      | 10  | 18.9      | 13  | 23.41      | 3.8   |
| <b>Sn</b> | 49        | 27  | 53.0      | 6    | 186       | 4   | 49        | 20  | 45.9      | 19  | 91        | 11   | 61.7      | 11  | 27.7      | 18  | 30.0      | 28  | 10.2       | 24    |
| <b>As</b> | 30.3      | 3.6 | 20.08     | 3.3  | 40.5      | 9.4 | 42.4      | 4.6 | 30.1      | 7.6 | 39.2      | 7.9  | 24.4      | 8.1 | 13.03     | 7.8 | 15.63     | 4.3 | 20.7       | 12    |
| <b>Ni</b> | 29.6      | 3.7 | 19.63     | 2.8  | 49.9      | 10  | 34.9      | 4.3 | 32.2      | 14  | 35.1      | 4.5  | 22.6      | 5.1 | 13.35     | 15  | 12.8      | 19  | 14.6       | 14    |
| <b>V</b>  | 27.14     | 1.6 | 20.9      | 6.8  | 33.50     | 3.0 | 29.1      | 18  | 27.72     | 2.4 | 31.6      | 9.9  | 25.05     | 3.9 | 16.81     | 12  | 17.07     | 1.8 | 25.9       | 6.1   |
| <b>Co</b> | 12.70     | 6.1 | 7.94      | 2.1  | 22.64     | 3.0 | 15.801    | 1.6 | 13.9      | 13  | 15.62     | 15.6 | 9.82      | 6.0 | 5.43      | 17  | 4.81      | 5.3 | 6.99       | 8.1   |
| <b>Mo</b> | 2.78      | 8.8 | 1.808     | 1.6  | 3.84      | 9.8 | 2.29      | 2.4 | 2.91      | 10  | 2.67      | 11   | 2.11      | 7.6 | 1.14      | 3.3 | 1.732     | 5.3 | 1.402      | 6.9   |
| <b>Tl</b> | 0.4924    | 1.5 | 0.447     | 5.4  | 0.3215    | 2.9 | 0.29      | 19  | 0.70      | 20  | 0.306     | 11   | 0.321     | 6.6 | 0.2113    | 7.3 | 0.241     | 7.3 | 0.213      | 7.4   |
| <b>Cd</b> | 0.49      | 24  | 0.271     | 23   | 0.308     | 13  | 0.283     | 19  | 0.451     | 11  | 0.266     | 19   | 0.302     | 9.0 | 0.180     | 13  | 0.4291    | 13  | 0.172      | 6.84  |
| <b>Ag</b> | 0.1912    | 4.6 | 0.202     | 7.02 | 0.259     | 11  | 0.2086    | 4.2 | 0.246     | 4.4 | 0.1980    | 3.3  | 0.197     | 7.5 | 0.193     | 14  | 0.1855    | 3.1 | 0.102      | 13.61 |

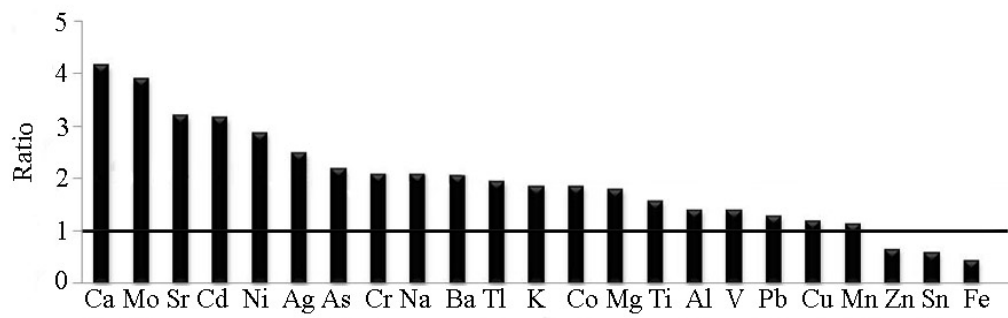

**Fig.SI 1** Representation of the ratio between the concentration of the metals in the <75  $\mu\text{m}$  and 75-250  $\mu\text{m}$  particle sizes. The horizontal line indicates the ratio equal to 1. Ratio<1: major elements in the finest fraction. Ratio >1: major elements in the coarser fraction.
